# Supplementary material
Source: PubMed Central journal article supplement (PMC3491972)
Supplement: supp_kwr457_kwr457_Web_Appendix.pdf [file supp_kwr457_kwr457_Web_Appendix.pdf]

## **Web Appendix – Levy et al.**

The following tables provide information on the 42 epidemiological studies addressing fine particulate matter differential toxicity, selected based on criteria delineated in the main text.

“Measure” refers to whether the numbers in the subsequent columns represent odds ratios (OR), relative risks (RR), hazard ratios (HR), effect estimates characterized by coefficients from regression models (EE), raw coefficients (Coeff), or attributable risks (AR). We report the statistical significance for each measure, noting whether the values reflect confidence intervals, p-values, t-values, or other measures. Where possible, we report values identically to how they were reported in the original publications (i.e., not converting between regression coefficients and relative risks), to facilitate direct comparison with the original publications. When estimates are presented with numerous lags, values are reported that are most consistent with the presentation of results by the original authors. For publications in which relevant estimates were only provided in figures, estimates are approximated using visual inspection.

“Single/multi” refers to whether the effect estimates reported were from models with individual particle constituents or multiple particle constituents included concurrently – whether gaseous pollutants or other confounders were addressed is not considered in this metric. Studies that provide quantitative estimates using both single-constituent and multi-constituent models have both sets of values reported.

Empty cells or missing confidence intervals indicate that the information was not reported in the original epidemiological study. When applicable, estimates from older studies are replaced by revised analyses addressing S-Plus GAM convergence criteria.

Mortality, hospital admissions, and emergency room visits are only presented for all-cause, cardiovascular, and respiratory disease, for ease of presentation, unless a study did not report any of those endpoints. For studies with multiple endpoints not available in other studies, a single representative endpoint is provided. For studies that did not include a total population estimate, values are provided for a single population stratification reported in the study.

Reference numbers refer to the bibliography in the main text.

Web Table 1: Time-series mortality, all-cause

| Location      | Meas.        | PM <sub>2.5</sub>    | EC                 | OC                 | Sulfate              | Nitrate            | Units                                                                    | Single/<br>multi? | Ref. |
|---------------|--------------|----------------------|--------------------|--------------------|----------------------|--------------------|--------------------------------------------------------------------------|-------------------|------|
| West Midlands | EE (CI)      | 0.6 (-1.5, 2.7)      | 0.6 (-1.5, 2.7)    |                    | -0.4 (-2.3, 1.5)     |                    | 17.7, 16.7, 5.8 $\mu\text{g}/\text{m}^3$                                 | Single            | (12) |
| London        | EE (CI)      | -0.04 (-0.46, 0.39)  | 0.12 (-0.26, 0.51) |                    | 0.29 (-0.34, 0.92)   | 0.03 (-0.47, 0.53) | 11, 3.4, 2.4, 3.4 $\mu\text{g}/\text{m}^3$                               | Single            | (13) |
| Santa Clara   | RR (CI)      | 1.09 (1.02, 1.17)    | 1.02 (0.99, 1.05)  |                    | 1.05 (1.01, 1.10)    | 1.07 (1.03, 1.12)  | 28 $\mu\text{g}/\text{m}^3$ , 0.9 COH, 2.8, 8.0 $\mu\text{g}/\text{m}^3$ | Single            | (23) |
| Atlanta       | Coeff (SE)   | 0.00398 (0.00161)    | 0.01024 (0.00993)  | 0.00142 (0.00644)  | 0.00920 (0.00495)    | 0.00342 (0.01662)  | 1 $\mu\text{g}/\text{m}^3$                                               | Single            | (27) |
| Philadelphia  | AR (p-value) | 0.0186 (p < 0.055)   | 0.0112 (p < 0.055) |                    | 0.0112 (p > 0.055)   |                    | N/A                                                                      | Single            | (28) |
| Detroit       | RR (CI)      | 1.027 (0.974, 1.083) |                    |                    | 1.015 (0.972, 1.059) |                    | 11 $\mu\text{g}/\text{m}^3$ , 47 nmole/ $\text{m}^3$                     | Single            | (30) |
| Boston        | EE (CI)      |                      | 2.3 (1.2, 3.4)     |                    | 1.1 (0.01, 2.0)      |                    | 0.2 g/m, 2.3 $\mu\text{g}/\text{m}^3$                                    | Single            | (33) |
| Boston        | EE (CI)      |                      | 2.2 (0.16, 4.2)    |                    | 0.45 (-0.45, 1.6)    |                    | 0.2 g/m, 2.3 $\mu\text{g}/\text{m}^3$                                    | Multi             | (33) |
| California    | EE (CI)      | 0.82 (-0.25, 1.9)    | 0.66 (-0.55, 1.89) | 0.64 (-0.44, 1.73) | 0.18 (-1.16, 1.55)   | 1.13 (-0.06, 2.35) | 14.6, 0.8, 4.6, 1.5, 5.5 $\mu\text{g}/\text{m}^3$                        | Single            | (38) |
| 6 cities      | EE (CI)      | 1.2 (0.8, 1.6)       |                    |                    | 1.5 (0.8, 2.3)       |                    | 10 $\mu\text{g}/\text{m}^3$                                              | Single            | (46) |
| Elizabeth     | Coeff (SE)   | 0.0007 (0.0015)      |                    |                    | -0.0023 (0.0048)     |                    |                                                                          | Single            | (48) |
| Newark        | Coeff (SE)   | 0.0017 (0.0003)      |                    |                    | 0.0061 (0.0018)      |                    |                                                                          | Single            | (48) |
| Camden        | Coeff (SE)   | 0.0022 (0.0011)      |                    |                    | 0.0020 (0.0025)      |                    |                                                                          | Single            | (48) |
| Vancouver     | EE (CI)      | 4.5 (-0.3, 9.5)      | 1.1 (-0.9, 3.1)    |                    | 2.9 (-4.4, 10.8)     |                    | 15.7 $\mu\text{g}/\text{m}^3$ , 0.4 COH, 3.3 $\mu\text{g}/\text{m}^3$    | Single            | (49) |

Web Table 2: Time-series mortality, CVD

| Location                                       | Meas.      | PM <sub>2.5</sub>          | EC                   | OC                        | Sulfate                    | Nitrate                | Units                                                         | Single/<br>multi? | Ref. |
|------------------------------------------------|------------|----------------------------|----------------------|---------------------------|----------------------------|------------------------|---------------------------------------------------------------|-------------------|------|
| Phoenix                                        | RR<br>(CI) | 1.06 (1.02,<br>1.10)       | 1.05 (1.01,<br>1.10) | 1.04<br>(1.00,<br>1.08)   |                            |                        | 8.5, 1.2, 3.0 µg/m <sup>3</sup>                               | Single            | (11) |
| West<br>Midlands                               | EE<br>(CI) | 0.9 (-2.1,<br>4.0)         | 1.5 (-1.5,<br>4.7)   |                           | -1.3 (-4.0,<br>1.5)        |                        | 17.7, 16.7, 5.8 µg/m <sup>3</sup>                             | Single            | (12) |
| Santa Clara                                    | RR<br>(CI) | 1.07 (0.95,<br>1.21)       | 1.03 (0.99,<br>1.07) |                           | 1.04 (0.97,<br>1.11)       | 1.09 (1.02,<br>1.17)   | 28 µg/m <sup>3</sup> , 0.9 COH,<br>2.8, 8.0 µg/m <sup>3</sup> | Single            | (23) |
| Detroit                                        | RR<br>(CI) | 1.032<br>(0.954,<br>1.116) |                      |                           | 1.013<br>(0.950,<br>1.080) |                        | 11 µg/m <sup>3</sup> , 47<br>nmole/m <sup>3</sup>             | Single            | (30) |
| Boston                                         | EE<br>(CI) |                            | 1.5 (-0.4,<br>3.4)   |                           | -0.2 (-1.5,<br>1.0)        |                        | 0.2 g/m, 2.3 µg/m <sup>3</sup>                                | Single            | (33) |
| California                                     | EE<br>(CI) | 1.55 (-<br>0.02, 3.14)     | 2.07 (0.29,<br>3.87) | 1.55 (-<br>0.06,<br>3.18) | 1.01 (-<br>1.01, 3.08)     | 1.52 (-<br>0.24, 3.31) | 14.6, 0.8, 4.6, 1.5, 5.5<br>µg/m <sup>3</sup>                 | Single            | (38) |
| California,<br>high school<br>graduates        | EE<br>(CI) | 1 (-2, 3)                  | 0 (-2, 2)            | -0.5 (-<br>2.5, 1.5)      | 1.5 (-1,<br>4.5)           | 1 (-2, 3)              | 14.6, 0.8, 4.6, 1.5, 5.5<br>µg/m <sup>3</sup>                 | Single            | (41) |
| California,<br>non-high<br>school<br>graduates | EE<br>(CI) | 6 (2, 11)                  | 4.5 (0.5,<br>9)      | 4.5 (1,<br>9)             | 2.5 (-2, 7)                | 4.5 (-0.5,<br>9)       | 14.6, 0.8, 4.6, 1.5, 5.5<br>µg/m <sup>3</sup>                 | Single            | (41) |
| Vancouver                                      | EE<br>(CI) | 3.0 (-4.2,<br>10.8)        | 0.3 (-2.6,<br>3.3)   |                           | 2.9 (-7.8,<br>15)          |                        | 15.7 µg/m <sup>3</sup> , 0.4 COH,<br>3.3 µg/m <sup>3</sup>    | Single            | (49) |

Web Table 3: Time-series mortality, respiratory

| Location      | Meas.   | PM <sub>2.5</sub>    | EC                 | OC                 | Sulfate              | Nitrate            | Units                                                      | Single/<br>multi? | Ref. |
|---------------|---------|----------------------|--------------------|--------------------|----------------------|--------------------|------------------------------------------------------------|-------------------|------|
| West Midlands | EE (CI) | -0.1 (-5.4, 5.5)     | 0.1 (-4.8, 5.2)    |                    | -1.8 (-6.4, 3.0)     |                    | 17.7, 16.7, 5.8 µg/m <sup>3</sup>                          | Single            | (12) |
| Santa Clara   | RR (CI) | 1.13 (0.89, 1.44)    | 1.10 (1.02, 1.18)  |                    | 1.15 (1.01, 1.30)    | 1.1 (0.95, 1.27)   | 28 µg/m <sup>3</sup> , 0.9 COH, 2.8, 8.0 µg/m <sup>3</sup> | Single            | (23) |
| Detroit       | RR (CI) | 1.033 (0.854, 1.249) |                    |                    | 1.056 (0.899, 1.245) |                    | 11 µg/m <sup>3</sup> , 47 nmole/m <sup>3</sup>             | Single            | (30) |
| Boston        | EE (CI) |                      | 3.7 (0.1, 7.4)     |                    | 2.1 (-1.1, 5.3)      |                    | 0.2 g/m, 2.3 µg/m <sup>3</sup>                             | Single            | (33) |
| California    | EE (CI) | 1.44 (-1.50, 4.48)   | 1.17 (-2.23, 4.69) | 0.99 (-2.13, 4.21) | 1.76 (-2.20, 5.89)   | 1.96 (-1.91, 5.99) | 14.6, 0.8, 4.6, 1.5, 5.5 µg/m <sup>3</sup>                 | Single            | (38) |
| Vancouver     | EE (CI) | 10 (-4.7, 26.8)      | 3.7 (-1.7, 9.3)    |                    | 8.3 (-12.3, 33.8)    |                    | 15.7 µg/m <sup>3</sup> , 0.4 COH, 3.3 µg/m <sup>3</sup>    | Single            | (49) |

Web Table 4: Cohort mortality

| Outcome     | Location    | Meas.         | PM <sub>2.5</sub>    | EC                   | OC                      | Sulfate              | Nitrate              | Units                                         | Single/<br>multi? | Ref. |
|-------------|-------------|---------------|----------------------|----------------------|-------------------------|----------------------|----------------------|-----------------------------------------------|-------------------|------|
| All-cause   | Netherlands | RR<br>(CI)    | 1.06 (0.97,<br>1.16) | 1.05 (1.00,<br>1.11) |                         |                      |                      | 10, 10 µg/m <sup>3</sup>                      | Single            | (15) |
| All-cause   | National    | Coeff<br>(SE) | 0.00611<br>(0.00691) | 0.1664<br>(0.05884)  | -0.001<br>(0.022)       | 0.00909<br>(0.01537) | 0.03751<br>(0.01517) | 1 µg/m <sup>3</sup>                           | Single            | (29) |
| All-cause   | National    | Coeff<br>(SE) |                      | 0.1126<br>(0.0664)   |                         |                      | 0.02602<br>(0.01678) | 1 µg/m <sup>3</sup>                           | Multi             | (29) |
| All-cause   | California  | HR<br>(CI)    | 1.49 (1.28,<br>1.74) | 1.10 (1.03,<br>1.19) | 1.70<br>(1.53,<br>1.87) | 1.49 (1.30,<br>1.71) | 1.40 (1.20,<br>1.65) | 6.1, 0.16, 1.0, 1.3, 3.6<br>µg/m <sup>3</sup> | Single            | (39) |
| CVD         | Netherlands | RR<br>(CI)    | 1.04 (0.90,<br>1.21) | 1.04 (0.95,<br>1.13) |                         |                      |                      | 10, 10 µg/m <sup>3</sup>                      | Single            | (15) |
| Respiratory | California  | HR<br>(CI)    | 1.39 (0.91,<br>2.11) | 0.94 (0.75,<br>1.16) | 1.55<br>(1.18,<br>2.02) | 1.61 (1.13,<br>2.31) | 1.39 (0.90,<br>2.13) | 6.1, 0.16, 1.0, 1.3, 3.6<br>µg/m <sup>3</sup> | Single            | (39) |
| Respiratory | Netherlands | RR<br>(CI)    | 1.07 (0.75,<br>1.52) | 1.22 (0.99,<br>1.50) |                         |                      |                      | 10, 10 µg/m <sup>3</sup>                      | Single            | (15) |

Web Table 5: Hospital admissions

| Outcome               | Location        | Meas.        | PM <sub>2.5</sub>  | EC                 | OC               | Sulfate          | Nitrate        | Units                                                                     | Single/<br>multi? | Ref. |
|-----------------------|-----------------|--------------|--------------------|--------------------|------------------|------------------|----------------|---------------------------------------------------------------------------|-------------------|------|
| CVD                   | West Midlands   | EE (CI)      | -0.5 (-2.6, 1.6)   | 1.0 (-1.0, 3.1)    |                  | 0.3 (-1.5, 2.1)  |                | 17.7, 16.7, 5.8 µg/m <sup>3</sup>                                         | Single            | (12) |
| CVD                   | Toronto         | RR (t-value) | 1.031 (1.80)       | 1.062 (5.63)       |                  | 1.017 (1.56)     |                | 11 µg/m <sup>3</sup> , 0.25 10 <sup>3</sup> ln ft, 40 nmol/m <sup>3</sup> | Single            | (18) |
| CVD, > 65             | 106 US Counties | EE (CI)      |                    | 25.8 (4.4, 47.2)   | -7 (23, -38)     | -18 (8, -38)     | 15 (-15, 45)   | 1.7, 9.0, 9.3, 9.7 % of total mass                                        | Single            | (16) |
| Respiratory           | West Midlands   | EE (CI)      | 1.2 (-0.9, 3.4)    | 2.1 (-0.1, 4.2)    |                  | 0.8 (-1.3, 2.9)  |                | 17.7, 16.7, 5.8 µg/m <sup>3</sup>                                         | Single            | (12) |
| Respiratory           | Toronto         | RR (t-value) | 1.037 (3.29)       | 1.037 (5.36)       |                  | 1.029 (4.07)     |                | 11 µg/m <sup>3</sup> , 0.25 10 <sup>3</sup> ln ft, 40 nmol/m <sup>3</sup> | Single            | (18) |
| Respiratory, > 65     | 106 US Counties | EE (CI)      |                    | 511 (80.7, 941)    | 350 (-350, 1000) | -350 (-800, 150) | 30 (-600, 600) | 1.7, 9.0, 9.3, 9.7 % of total mass                                        | Single            | (16) |
| Respiratory, children | California      | EE (CI)      | 4.1 (1.8, 6.4)     | 5.4 (0.8, 10.3)    | 3.4 (1.1, 5.7)   | 3.0 (0.4, 5.7)   | 3.3 (1.1, 5.5) | 14.6, 0.8, 4.5, 1.5, 5.7 µg/m <sup>3</sup>                                | Single            | (40) |
| Myocardial infarction | Boston          | EE (CI)      | 8.65 (1.22, 15.38) | 8.34 (0.21, 15.82) |                  |                  |                | 16.32, 1.69 µg/m <sup>3</sup>                                             | Single            | (50) |

Web Table 6: Emergency room visits

| Outcome     | Location | Meas.      | PM <sub>2.5</sub>          | EC                         | OC                         | Sulfate                    | Nitrate                    | Units                                             | Single/<br>multi? | Ref. |
|-------------|----------|------------|----------------------------|----------------------------|----------------------------|----------------------------|----------------------------|---------------------------------------------------|-------------------|------|
| CVD         | Atlanta  | RR<br>(CI) | 1.033<br>(1.010,<br>1.056) | 1.020<br>(1.005,<br>1.036) | 1.026<br>(1.006,<br>1.046) | 1.003<br>(0.968,<br>1.039) |                            | 10, 1, 2, 5 µg/m <sup>3</sup>                     | Single            | (34) |
| Respiratory | Atlanta  | RR<br>(CI) | 1.016<br>(0.997,<br>1.035) | 0.999<br>(0.987,<br>1.011) | 1.011<br>(0.997,<br>1.025) | 0.998<br>(0.968,<br>1.028) |                            | 10, 1, 2, 5 µg/m <sup>3</sup>                     | Single            | (43) |
| Respiratory | National | EE<br>(CI) | 0.44 (-<br>0.36, 1.23)     | 0.4 (-0.1,<br>0.9)         | 0.82<br>(0.22,<br>1.44)    | 0.7 (-0.1,<br>1.5)         | 0.0 (-0.5,<br>0.5)         | 9.4, 0.4, 3.2, 3.1, 1.6<br>µg/m <sup>3</sup>      | Single            | (8)  |
| Respiratory | National | EE<br>(CI) |                            | 0.0 (-0.9,<br>0.9)         | 1.07<br>(0.12,<br>2.04)    | 0.9 (-0.1,<br>1.7)         | -0.1 (-0.6,<br>0.4)        | 9.4, 0.4, 3.2, 3.1, 1.6<br>µg/m <sup>3</sup>      | Multi             | (8)  |
| Respiratory | Atlanta  | RR<br>(CI) | 1.005<br>(0.996,<br>1.015) | 0.996<br>(0.988,<br>1.003) | 0.997<br>(0.990,<br>1.005) | 1.020<br>(1.010,<br>1.030) | 0.999<br>(0.991,<br>1.006) | IQR increase, not<br>reported                     | Single            | (44) |
| CVD         | National | EE<br>(CI) | 0.64 (0.12,<br>1.15)       | 0.72 (0.43,<br>1.01)       | 0.66<br>(0.29,<br>1.02)    | 0.4 (0.0,<br>0.9)          | 0.46 (0.17,<br>0.75)       | 9.4, 0.4, 3.2, 3.1, 1.6<br>µg/m <sup>3</sup>      | Single            | (8)  |
| CVD         | National | EE<br>(CI) |                            | 0.8 (0.34,<br>1.27)        | 0.63<br>(0.06,<br>1.19)    | 0.0 (-0.5,<br>0.5)         | 0.25 (-0.1,<br>0.6)        | IQR: 9.4, 0.4, 3.2, 3.1,<br>1.6 µg/m <sup>3</sup> | Multi             | (8)  |
| CVD         | Atlanta  | RR<br>(CI) | 1.022<br>(1.007,<br>1.038) | 1.025<br>(1.013,<br>1.037) | 1.024<br>(1.013,<br>1.035) | 1.007<br>(0.994,<br>1.019) | 1.002<br>(0.990,<br>1.014) | IQR increase, not<br>reported                     | Single            | (44) |

Web Table 7: Miscellaneous respiratory outcomes

| Outcome                                | Location         | Meas.        | PM <sub>2.5</sub>    | EC                   | OC                   | Sulfate              | Nitrate | Units                                                         | Single/<br>multi? | Ref. |
|----------------------------------------|------------------|--------------|----------------------|----------------------|----------------------|----------------------|---------|---------------------------------------------------------------|-------------------|------|
| Asthma development                     | British Columbia | OR (CI)      | 1.01 (0.99, 1.03)    | 1.14 (1.01, 1.29)    |                      |                      |         | 1 µg/m <sup>3</sup> , 10 <sup>-5</sup> /m in absorbance       | Single            | (20) |
| Asthma development                     | Munich           | OR (CI)      | 1.12 (0.94, 1.29)    | 1.56 (1.03, 2.37)    |                      |                      |         | 1 µg/m <sup>3</sup> , 0.2 x 10 <sup>-5</sup> /m in absorbance | Single            | (35) |
| Cough in first year of life            | Munich           | OR (CI)      | 1.34 (1.11, 1.61)    | 1.32 (1.10, 1.59)    |                      |                      |         | 1.5 µg/m <sup>3</sup> , 0.4 x 10 <sup>-5</sup> /m             | Single            | (24) |
| Exhaled NO, asthmatics                 | Mexico           | EE (CI)      | 3 (-8, 15)           | 2 (-10, 17)          |                      |                      |         | 5.1, 5.1 µg/m <sup>3</sup>                                    | Single            | (26) |
| FEV1                                   | Vancouver        | EE (CI)      | -1.1 (-3.4, 1.3)     |                      |                      | -0.3 (-1.3, 0.8)     |         | 10, 1 µg/m <sup>3</sup>                                       | Single            | (17) |
| Outpatient visits for pediatric asthma | Atlanta          | RR (CI)      | 1.043 (0.979, 1.111) | 1.046 (1.004, 1.091) | 1.049 (1.006, 1.093) | 1.017 (0.954, 1.084) |         | 9.1, 1.25, 2.4, 3.4 µg/m <sup>3</sup>                         | Single            | (47) |
| Wheeze, children                       | NYC              | EE (p-value) | -0.13 (0.03)         | 0.02 (0.66)          |                      |                      |         | 2.1, 0.29 µg/m <sup>3</sup>                                   | Single            | (42) |



Web Table 8: Miscellaneous cardiovascular and pre-term birth outcomes

| Outcome                  | Location     | Meas.         | PM <sub>2.5</sub>     | EC                   | OC                   | Sulfate             | Nitrate           | Units                                      | Single/<br>multi? | Ref. |
|--------------------------|--------------|---------------|-----------------------|----------------------|----------------------|---------------------|-------------------|--------------------------------------------|-------------------|------|
| Arrhythmia (SVE)         | Steubenville | OR (CI)       | 1.42 (0.99, 2.04)     | 1.15 (0.73, 1.81)    |                      | 1.70 (1.12, 2.57)   |                   | IQR: 10, 4.2, 0.5 µg/m <sup>3</sup>        | Single            | (45) |
| BP, diastolic            | Los Angeles  | EE (CI)       | 2.06 (0.86, 3.26)     | 2.38 (0.99, 3.76)    | 4.57 (1.91, 7.23)    |                     |                   | 16, 1.02, 5.2 µg/m <sup>3</sup>            | Single            | (22) |
| BP, systolic             | Los Angeles  | EE (CI)       | 3.37 (1.15, 5.60)     | 3.14 (0.57, 5.71)    | 6.03 (1.00, 11.06)   |                     |                   | 16, 1.02, 5.2 µg/m <sup>3</sup>            | Single            | (22) |
| DNA (LINE-1) methylation | Boston       | % of ΔSD (CI) | -0.13 (-0.19, -0.06)  | -0.11 (-0.18, -0.04) |                      | -0.04 (-0.12, 0.04) |                   | 3.9, 0.26, 1.4 µg/m <sup>3</sup>           | Single            | (14) |
| Flow-mediated dilation   | Boston       | EE (CI)       | -6.2 (-13, 1)         | -9.3 (-17.8, 0.2)    |                      | -9.0 (-14.9, -2.7)  |                   | IQR increase, not reported                 | Single            | (36) |
| HRV/LF                   | Steubenville | EE (CI)       | -10.7 (-20.1, -0.3)   | -4.7 (-12.7, 4.0)    |                      | -8.4 (-17.0, 1.2)   |                   | 13.4, 0.6, 5.1 µg/m <sup>3</sup>           | Single            | (31) |
| HRV/SDNN                 | Taiwan       | EE (CI)       | -3.96 (-7.08, -0.84)  |                      | -1.31 (-4.11, 1.49)  | -2.02 (-5.40, 1.35) |                   | 53, 7.8, 14.6 µg/m <sup>3</sup>            | Single            | (19) |
| HRV/SDNN                 | Steubenville | EE (CI)       | -4.0 (-7.0, -0.9)     | 1.5 (-1.1, 4.1)      |                      | -3.3 (-6.0, -0.5)   |                   | 13.4, 0.6, 5.1 µg/m <sup>3</sup>           | Single            | (32) |
| ICD firing               | London       | OR (CI)       | 1.012 (0.919-1.115)   | 0.992 (0.916-1.074)  |                      | 1.025 (1.003-1.047) |                   | 10, 10, 1 µg/m <sup>3</sup>                | Single            | (51) |
| T-wave amplitude         | Erfurt       | EE (CI)       | -6.46 (-10.88, -2.04) | -4.67 (-10.0, 0.67)  | -4.31 (-10.07, 1.44) |                     |                   | 16.4, 2.3, 0.7 µg/m <sup>3</sup>           | Single            | (25) |
| VCAM-1                   | Boston       | EE (CI)       | 11.8 (3.5, 20.7)      | 27.5 (12.0, 45.2)    |                      | -0.46 (-1.99, 1.09) |                   | 7.6, 0.6, 2.2 µg/m <sup>3</sup>            | Single            | (37) |
| Pre-term birth           | Atlanta      | RR (CI)       | 1.00 (0.96, 1.03)     | 1.04 (0.98, 1.10)    | 1.01 (0.95, 1.08)    | 1.09 (1.01, 1.19)   | 0.98 (0.90, 1.08) | 6.0, 0.7, 1.7, 3.0, 0.75 µg/m <sup>3</sup> | Single            | (21) |
